# Supplementary material
Source: HighWire-hosted journal article supplement (http://www.ajnr.org/highwire/filestream/77796/field_highwire_adjunct_files/0/20-00482.pdf)
Supplement: 20-00482.pdf [file 20-00482.pdf]

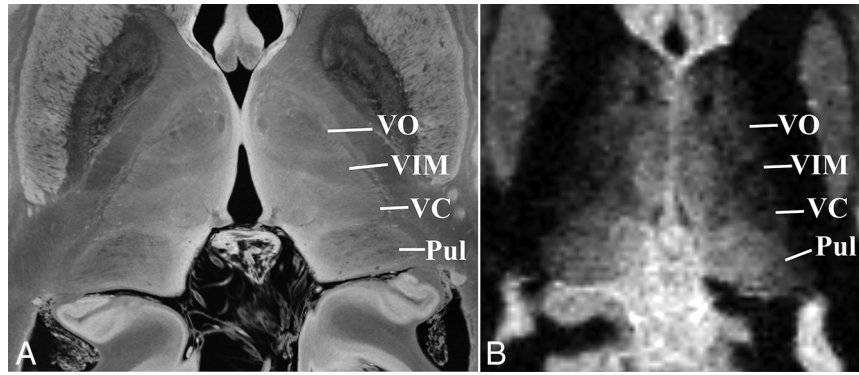

**ON-LINE FIGURE.** Axial 7T image (A) and axial 3T FGATIR image (B) illustrating the internal architecture of the ventral thalamus with key ventral nuclei, including the ventral caudal, VIM, and VO nuclei lying anterior to the pulvinar (Pul).
